# Supplementary material
Source: PubMed Central journal article supplement (PMC3257176)
Supplement: NIHMS323110-supplement-02.pdf [file NIHMS323110-supplement-02.pdf]

## Data used in the computation of the results

**Table A.** Stoichiometric equations and thermodynamic information (per mole glucose) of the four remaining elementary modes. The reaction enthalpy ( $\Delta H$ ) and reaction free energy ( $\Delta G$ ) were computed using the enthalpy and free energies of combustion given in Table D.  $dF$  is the dissipation function defined as  $(\Delta S - \Delta H/T)$ .

| Family | Reaction stoichiometry                                                                                                | $\Delta H$<br>[kJ/mol] | $\Delta G$<br>[kJ/mol] | $\Delta S$<br>[kJ/K-mol] | $dF$<br>[kJ/K-mol] |
|--------|-----------------------------------------------------------------------------------------------------------------------|------------------------|------------------------|--------------------------|--------------------|
| 1      | Glucose $\rightarrow$ 2 Ethanol + 2 CO <sub>2</sub> + 2 ATP                                                           | 1253.8                 | 1074.5                 | 0.547                    | -3.28              |
| 2      | Glucose $\rightarrow$ 2 Ethanol + 2 CO <sub>2</sub>                                                                   | -69.0                  | -234.0                 | 0.503                    | 0.71               |
| 3      | Glucose + 0.70 NH <sub>3</sub> $\rightarrow$ 2.88 Biomass + 0.11 H <sub>2</sub> + 1.10 Ethanol + 1.18 CO <sub>2</sub> | -1409.6                | -1564.8                | 0.473                    | 4.77               |
| 4      | Glucose + 0.70 NH <sub>3</sub> $\rightarrow$ 2.88 Biomass + 0.11 Formate + 1.10 Ethanol + 1.07 CO <sub>2</sub>        | -1426.5                | -1575.0                | 0.453                    | 4.80               |

**Table B.** Probabilities of family modes and thermodynamic information for a fully evolved cell metabolism. The thermodynamic information is determined from the weighted sum of the probabilities and the thermodynamic information of individual modes.

| Family                          | Asymptotic<br>$p_{Fi}$ | Predicted<br>$p_{Fi}$ |
|---------------------------------|------------------------|-----------------------|
| 1                               | 0.214                  | 0.214                 |
| 2                               | 0.233                  | 0.242                 |
| 3                               | 0.273                  | 0.264                 |
| 4                               | 0.298                  | 0.279                 |
| $\Delta S_{TOT}$<br>(kJ/K-mole) | 0.50                   | 0.49                  |
| $\Delta H_{TOT}$<br>(kJ/mole)   | -557.7                 | -518.5                |
| $\Delta G_{TOT}$<br>(kJ/mole)   | -721.1                 | -679.2                |
| $dF$<br>(kJ/K-mole)             | 2.20                   | 2.07                  |

**Table C.** Change in probabilities of family modes and biomass yield during metabolic evolution. The biomass yield is determined from the weighted sum of the probabilities and the yield of biomass of individual modes.

| Family         | $p_{Fi}$<br>(at 0 gen) | $p_{Fi}$<br>(at 280 gen) | $p_{Fi}$<br>(at $\infty$ gen) |
|----------------|------------------------|--------------------------|-------------------------------|
| 1              | 0.411                  | 0.337                    | 0.214                         |
| 2              | 0.411                  | 0.337                    | 0.233                         |
| 3              | 0.078                  | 0.162                    | 0.273                         |
| 4              | 0.078                  | 0.162                    | 0.298                         |
| $Y_x$<br>(g/g) | 0.064                  | 0.132                    | 0.234                         |

**Table D.** Enthalpy and Gibbs free energies of combustion for metabolites. The energy values were obtained from Sandler and Orbey (1991).

| Metabolite     | Enthalpy of Combustion [kJ/mol] | Free Energy of Combustion [kJ/mol] |
|----------------|---------------------------------|------------------------------------|
| glucose        | 2807.0                          | 2872.0                             |
| xylose         | 2180.8                          | 2204.6                             |
| ethanol        | 1369.0                          | 1319.0                             |
| acetate        | 876.0                           | 894.0                              |
| ammonia        | 348.1                           | 391.9                              |
| lactate        | 1308.4                          | 1322.6                             |
| formate        | 127.5                           | 140.5                              |
| hydrogen       | 285.9                           | 237.2                              |
| propionic acid | 1529.0                          | 1533.0                             |
| biomass        | 1388056.8                       | 1403173.2                          |
| ATP            | 661.4                           | 654.2                              |

**Table E.** The biomass growth rate, the glucose consumption rate and the ethanol secretion rates (C-mole/hr) during adaptive evolution. The rate of each metabolite was determined from the slope of the linear regression of time plots of the metabolite concentration.

|                      | unevolved (at 0 gen) | evolved (at 75 gen) | evolved (at 159 gen) | evolved (at 251 gen) | evolved (at 280 gen) |
|----------------------|----------------------|---------------------|----------------------|----------------------|----------------------|
| $R_{\text{Glucose}}$ | 0.64                 | 3.00                | 4.03                 | 4.27                 | 4.28                 |
| $R_{\text{Ethanol}}$ | 0.27                 | 1.42                | 1.75                 | 1.78                 | 1.83                 |
| $R_{\text{Biomass}}$ | 0.20                 | 0.40                | 0.53                 | 0.63                 | 0.62                 |
